# Supplementary material for: Application of Rhamnolipids as Dispersing Agents for the Fabrication of Composite MnO2-Carbon Nanotube Electrodes for Supercapacitors
Source: MDPI journal article supplement (doi:10.3390/molecules27051659), 2022-03-03
Supplement: s1 [file s1]

Supplementary information

# Application of Rhamnolipids as Dispersing Agents for the Fabrication of Composite MnO<sub>2</sub>-Carbon Nanotube Electrodes for Supercapacitors

Wenjuan Yang, Wenyu Liang and Igor Zhitomirsky \*

Department of Materials Science and Engineering, McMaster University, Hamilton, ON L8S4L7, Canada; yangw48@mcmaster.ca (W.Y.); liangw26@mcmaster.ca (W.L.)

\* Correspondence: zhitom@mcmaster.ca

**Citation:** Yang, W.; Liang, W.; Zhitomirsky, I. Application of Rhamnolipids as Dispersing Agents for the Fabrication of Composite MnO<sub>2</sub>-Carbon Nanotube Electrodes for Supercapacitors. *Molecules* **2022**, *27*, 1659. <https://doi.org/10.3390/molecules27051659>

Academic Editor: Tao Wang

Received: 26 January 2022

Accepted: 1 March 2022

Published: 3 March 2022

**Publisher's Note:** MDPI stays neutral with regard to jurisdictional claims in published maps and institutional affiliations.

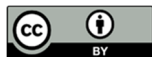

**Copyright:** © 2022 by the authors. Licensee MDPI, Basel, Switzerland. This article is an open access article distributed under the terms and conditions of the Creative Commons Attribution (CC BY) license (<https://creativecommons.org/licenses/by/4.0/>).

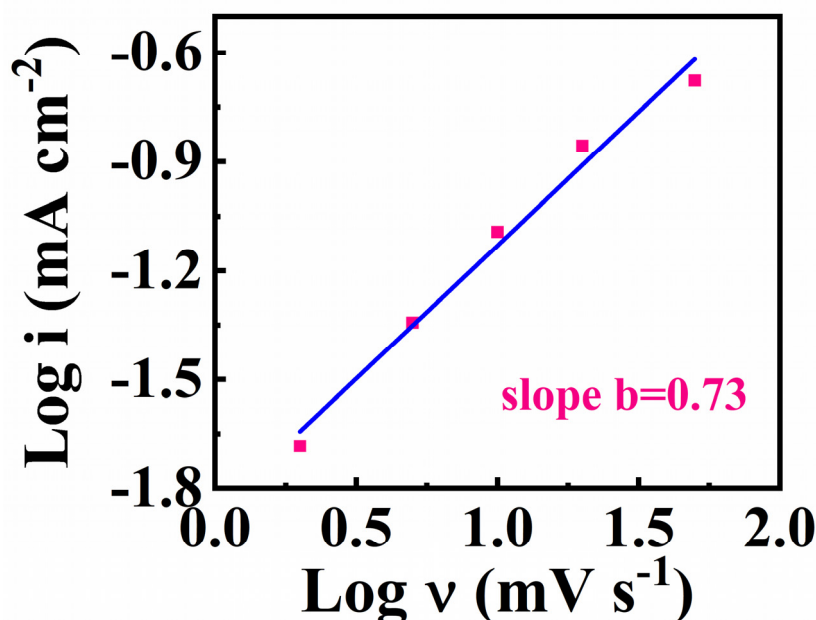

**Figure S1.** Current (*i*) versus scan rate (*v*) dependence in a logarithmic scale used for the calculation of parameter *b* for electrodes from the equation  $i = av^b$ .
